# Supplementary material
Source: HighWire-hosted journal article supplement (https://bmjopen.bmj.com/content/14/1/e079155)
Supplement: inline-supplementary-material-1 [file inline-supplementary-material-1.pdf]

## Supplemental File 1: The ALPACA Study

### 1. Instruments to measure the process of shared decision making

Figure S1 CollaboRATE measure

collabo**RATE**<sup>TM</sup>

**1. How much effort was made to help you understand your health issues?**

|                    |   |   |   |   |   |   |   |   |                       |
|--------------------|---|---|---|---|---|---|---|---|-----------------------|
| 0                  | 1 | 2 | 3 | 4 | 5 | 6 | 7 | 8 | 9                     |
| No effort was made |   |   |   |   |   |   |   |   | Every effort was made |

**2. How much effort was made to listen to the things that matter most to you about your health issues?**

|                    |   |   |   |   |   |   |   |   |                       |
|--------------------|---|---|---|---|---|---|---|---|-----------------------|
| 0                  | 1 | 2 | 3 | 4 | 5 | 6 | 7 | 8 | 9                     |
| No effort was made |   |   |   |   |   |   |   |   | Every effort was made |

**3. How much effort was made to include what matters most to you in choosing what to do next?**

|                    |   |   |   |   |   |   |   |   |                       |
|--------------------|---|---|---|---|---|---|---|---|-----------------------|
| 0                  | 1 | 2 | 3 | 4 | 5 | 6 | 7 | 8 | 9                     |
| No effort was made |   |   |   |   |   |   |   |   | Every effort was made |

From: Elwyn, Glyn, Paul James Barr, Stuart W. Grande, Rachel Thompson, Thom Walsh, and Elissa M. Ozanne. "Developing CollaboRATE: a fast and frugal patient-reported measure of shared decision making in clinical encounters." *Patient education and counseling* 93, no. 1 (2013): 102-107.

Figure S2 The 9-item Shared Decision Making Questionnaire (SDM-Q-9)

### The 9-item Shared Decision Making Questionnaire (SDM-Q-9)

**[Example] Please indicate which health complaint/problem/illness the consultation was about:**

**[Example] Please indicate which decision was made:**

**Nine statements related to the decision-making in your consultation are listed below. For each statement please indicate how much you agree or disagree.**

|                                                                                                    |                                                 |                                               |                                               |                                            |                                            |                                              |
|----------------------------------------------------------------------------------------------------|-------------------------------------------------|-----------------------------------------------|-----------------------------------------------|--------------------------------------------|--------------------------------------------|----------------------------------------------|
| <b>1. My doctor made clear that a decision needs to be made.</b>                                   | completely disagree<br><input type="checkbox"/> | strongly disagree<br><input type="checkbox"/> | somewhat disagree<br><input type="checkbox"/> | somewhat agree<br><input type="checkbox"/> | strongly agree<br><input type="checkbox"/> | completely agree<br><input type="checkbox"/> |
| <b>2. My doctor wanted to know exactly how I want to be involved in making the decision.</b>       | completely disagree<br><input type="checkbox"/> | strongly disagree<br><input type="checkbox"/> | somewhat disagree<br><input type="checkbox"/> | somewhat agree<br><input type="checkbox"/> | strongly agree<br><input type="checkbox"/> | completely agree<br><input type="checkbox"/> |
| <b>3. My doctor told me that there are different options for treating my medical condition.</b>    | completely disagree<br><input type="checkbox"/> | strongly disagree<br><input type="checkbox"/> | somewhat disagree<br><input type="checkbox"/> | somewhat agree<br><input type="checkbox"/> | strongly agree<br><input type="checkbox"/> | completely agree<br><input type="checkbox"/> |
| <b>4. My doctor precisely explained the advantages and disadvantages of the treatment options.</b> | completely disagree<br><input type="checkbox"/> | strongly disagree<br><input type="checkbox"/> | somewhat disagree<br><input type="checkbox"/> | somewhat agree<br><input type="checkbox"/> | strongly agree<br><input type="checkbox"/> | completely agree<br><input type="checkbox"/> |
| <b>5. My doctor helped me understand all the information.</b>                                      | completely disagree<br><input type="checkbox"/> | strongly disagree<br><input type="checkbox"/> | somewhat disagree<br><input type="checkbox"/> | somewhat agree<br><input type="checkbox"/> | strongly agree<br><input type="checkbox"/> | completely agree<br><input type="checkbox"/> |
| <b>6. My doctor asked me which treatment option I prefer.</b>                                      | completely disagree<br><input type="checkbox"/> | strongly disagree<br><input type="checkbox"/> | somewhat disagree<br><input type="checkbox"/> | somewhat agree<br><input type="checkbox"/> | strongly agree<br><input type="checkbox"/> | completely agree<br><input type="checkbox"/> |
| <b>7. My doctor and I thoroughly weighed the different treatment options.</b>                      | completely disagree<br><input type="checkbox"/> | strongly disagree<br><input type="checkbox"/> | somewhat disagree<br><input type="checkbox"/> | somewhat agree<br><input type="checkbox"/> | strongly agree<br><input type="checkbox"/> | completely agree<br><input type="checkbox"/> |
| <b>8. My doctor and I selected a treatment option together.</b>                                    | completely disagree<br><input type="checkbox"/> | strongly disagree<br><input type="checkbox"/> | somewhat disagree<br><input type="checkbox"/> | somewhat agree<br><input type="checkbox"/> | strongly agree<br><input type="checkbox"/> | completely agree<br><input type="checkbox"/> |
| <b>9. My doctor and I reached an agreement on how to proceed.</b>                                  | completely disagree<br><input type="checkbox"/> | strongly disagree<br><input type="checkbox"/> | somewhat disagree<br><input type="checkbox"/> | somewhat agree<br><input type="checkbox"/> | strongly agree<br><input type="checkbox"/> | completely agree<br><input type="checkbox"/> |

From: Kriston, L., Scholl, I., Hölzel, L., Simon, D., Loh, A., & Härter, M. (2010). The 9-item Shared Decision Making Questionnaire (SDM-Q-9). Development and psychometric properties in a primary care sample. *Patient education and counseling*, 80(1), 94-99.

Figure S3 SHARED measure

**SHARED – A Patient Experience of Shared Decision Making Questionnaire**

What was your experience of making this treatment decision with your [health professional/s] – for each statement, tick the box that matches best how much you agree with it:

|                                     |                                                                                       | Disagree<br>Strongly     | Disagree                 | Not<br>Sure              | Agree                    | Agree<br>Strongly        |
|-------------------------------------|---------------------------------------------------------------------------------------|--------------------------|--------------------------|--------------------------|--------------------------|--------------------------|
| <b>The [health] professional...</b> |                                                                                       |                          |                          |                          |                          |                          |
| 1                                   | talked about other options from the one I chose                                       | <input type="checkbox"/> | <input type="checkbox"/> | <input type="checkbox"/> | <input type="checkbox"/> | <input type="checkbox"/> |
| 2                                   | talked about whether or not there was a medically best option for my [health problem] | <input type="checkbox"/> | <input type="checkbox"/> | <input type="checkbox"/> | <input type="checkbox"/> | <input type="checkbox"/> |
| 3                                   | gave their views about the options                                                    | <input type="checkbox"/> | <input type="checkbox"/> | <input type="checkbox"/> | <input type="checkbox"/> | <input type="checkbox"/> |
| 4                                   | asked for my views about the options                                                  | <input type="checkbox"/> | <input type="checkbox"/> | <input type="checkbox"/> | <input type="checkbox"/> | <input type="checkbox"/> |
| <b>I talked about...</b>            |                                                                                       |                          |                          |                          |                          |                          |
| 5                                   | what was important to me about this decision                                          | <input type="checkbox"/> | <input type="checkbox"/> | <input type="checkbox"/> | <input type="checkbox"/> | <input type="checkbox"/> |
| 6                                   | why one option suited me better than another                                          | <input type="checkbox"/> | <input type="checkbox"/> | <input type="checkbox"/> | <input type="checkbox"/> | <input type="checkbox"/> |
| 7                                   | the risks and benefits of the options for me and my health                            | <input type="checkbox"/> | <input type="checkbox"/> | <input type="checkbox"/> | <input type="checkbox"/> | <input type="checkbox"/> |
| <b>I felt...</b>                    |                                                                                       |                          |                          |                          |                          |                          |
| 8                                   | it would be OK to choose any option we talked about                                   | <input type="checkbox"/> | <input type="checkbox"/> | <input type="checkbox"/> | <input type="checkbox"/> | <input type="checkbox"/> |
| 9                                   | the decision made was the best one for me                                             | <input type="checkbox"/> | <input type="checkbox"/> | <input type="checkbox"/> | <input type="checkbox"/> | <input type="checkbox"/> |
| 10                                  | the [health] professional and I agreed which option was the best one for me           | <input type="checkbox"/> | <input type="checkbox"/> | <input type="checkbox"/> | <input type="checkbox"/> | <input type="checkbox"/> |

From: Bekker HL, Légaré F, Nye A, Walker W. SHARED – A Patient Experience of Shared Decision Making Questionnaire. (2012). University of Leeds, UK

## 2. Example topic guides for qualitative data collection

**Table S1** Usability testing (1.2) – interview guide

|                                                                                                                                                                                                                                                                                                                                                                                                                                                                                                                                                                                                                                                                                                                                                                                                                                                                                                                                                                                                                                                                                                                                                                                                                                                                                                                                                                                                                                                                                                                                                                                                                                                                                                                                                                                                                                                                                                                                                                                                                                                                                                                                                                                                                                                                                                                                                                                                                                                                                                                                                                                                                                                                                                                                                                                                                                                                                                                         |
|-------------------------------------------------------------------------------------------------------------------------------------------------------------------------------------------------------------------------------------------------------------------------------------------------------------------------------------------------------------------------------------------------------------------------------------------------------------------------------------------------------------------------------------------------------------------------------------------------------------------------------------------------------------------------------------------------------------------------------------------------------------------------------------------------------------------------------------------------------------------------------------------------------------------------------------------------------------------------------------------------------------------------------------------------------------------------------------------------------------------------------------------------------------------------------------------------------------------------------------------------------------------------------------------------------------------------------------------------------------------------------------------------------------------------------------------------------------------------------------------------------------------------------------------------------------------------------------------------------------------------------------------------------------------------------------------------------------------------------------------------------------------------------------------------------------------------------------------------------------------------------------------------------------------------------------------------------------------------------------------------------------------------------------------------------------------------------------------------------------------------------------------------------------------------------------------------------------------------------------------------------------------------------------------------------------------------------------------------------------------------------------------------------------------------------------------------------------------------------------------------------------------------------------------------------------------------------------------------------------------------------------------------------------------------------------------------------------------------------------------------------------------------------------------------------------------------------------------------------------------------------------------------------------------------|
| <p><b>Intro</b></p> <ul style="list-style-type: none"> <li>• Thank you and introduction</li> <li>• Explanation of project (assess to what extent), ask if there are questions</li> <li>• Ask for preferred mode for completing the survey (sms/email) and send the link</li> <li>• Check if ok to audio record → <i>switch on recording</i></li> <li>• Explain purpose of the session:             <ul style="list-style-type: none"> <li>○ We would like to test the survey that patients receive when booked in for surgery.</li> <li>○ The focus is on <b>functionality</b>. It helps us make improvements to the process.</li> <li>○ This session is <b>NOT</b> about the wording of questions, we are just interested in the usability</li> <li>○ The text/email is a tester only, so the responses you give are not real</li> </ul> </li> <li>• Explain specific tasks:             <ul style="list-style-type: none"> <li>○ There are two surveys. 8 steps (3 questions) for the first one, 20 steps (9 questions) for the second one.</li> <li>○ We will                 <ul style="list-style-type: none"> <li>▪ run through these steps and see how you get on with these</li> <li>▪ might feel a little unnatural but is important you tell me what you think and what you see, what is clear/unclear, what is easy/not straight forward or difficult to complete</li> </ul> </li> <li>○ Say where there is a problem, e.g. that you had to press twice to proceed</li> </ul> </li> <li>• Explain there will be questions at the end</li> </ul> <p><b>Think-aloud exercise</b></p> <p>Start with 8 steps of CollaboRATE</p> <ul style="list-style-type: none"> <li>• Prompts if participant doesn't talk             <ul style="list-style-type: none"> <li>○ Can you tell me what you currently see?</li> <li>○ What are you going to do next?</li> <li>○ What can you see now?</li> </ul> </li> <li>• Prompts to elicit views             <ul style="list-style-type: none"> <li>○ Could you tell me what you think about Step X?</li> <li>○ How do you feel about Step X?</li> <li>○ What do you think about Step X?</li> <li>○ How clear is Step X?</li> <li>○ How easy is Step X?</li> </ul> </li> </ul> <p>Pause and ask follow-up questions</p> <ul style="list-style-type: none"> <li>• “Having just completed the survey...”             <ul style="list-style-type: none"> <li>○ How easy do you think is it to respond to the survey?</li> <li>○ What do you think about the length of the survey?</li> <li>○ What are your thoughts on the overall visual display? How visually appealing is the survey?</li> <li>○ What would stop people from doing the survey? <i>Why?</i></li> <li>○ What issues can you think of people might encounter when completing the survey? <i>Why?</i></li> <li>○ What else would you change about how the survey is delivered? <i>Why?</i></li> </ul> </li> </ul> |
|-------------------------------------------------------------------------------------------------------------------------------------------------------------------------------------------------------------------------------------------------------------------------------------------------------------------------------------------------------------------------------------------------------------------------------------------------------------------------------------------------------------------------------------------------------------------------------------------------------------------------------------------------------------------------------------------------------------------------------------------------------------------------------------------------------------------------------------------------------------------------------------------------------------------------------------------------------------------------------------------------------------------------------------------------------------------------------------------------------------------------------------------------------------------------------------------------------------------------------------------------------------------------------------------------------------------------------------------------------------------------------------------------------------------------------------------------------------------------------------------------------------------------------------------------------------------------------------------------------------------------------------------------------------------------------------------------------------------------------------------------------------------------------------------------------------------------------------------------------------------------------------------------------------------------------------------------------------------------------------------------------------------------------------------------------------------------------------------------------------------------------------------------------------------------------------------------------------------------------------------------------------------------------------------------------------------------------------------------------------------------------------------------------------------------------------------------------------------------------------------------------------------------------------------------------------------------------------------------------------------------------------------------------------------------------------------------------------------------------------------------------------------------------------------------------------------------------------------------------------------------------------------------------------------------|

**Table S2** Exploring views of under-served groups (1.3) – interview guide

### Background

- Intro to interviewer (name, role and inability to answer care-related questions)
- Explain what SDM is and the main aim of the research project (focus on what SDM is vs isn't, current problem and relevance/importance to community)
- Reminder of anonymity, confidentiality and that interview can be stopped at any time.
- *Take questions*
- Reminder of recording and check participant is happy
- *Switch on recorder*

### Explore context of SDM experience

Having just explained a bit more about what the research aims to do and what good shared decision making looks like, I am interested to hear from you...

- What is your experience with decision making for any healthcare treatment?
- How much involvement in decisions about surgical treatment would you prefer?
- Do you feel that, for whatever reason, you felt that you were/would be treated unequal to others in terms of making decision?

### Exploring intervention components

- What do you think about the hospital using this survey to record people's experiences of how involved they felt in the surgical decision making?
- How do you feel about personal survey responses being passed on to the clinical team and you/the patient not being anonymous?
- What do you think needs to happen next to make sure you/ patients are given a voice and SDM is improved?
- How well do you think this process would work for everyone?
